# Supplementary material for: Direct measure of soil carbon persistence over annual to centennial timescales
Source: Research Square preprint supplement (doi:10.21203/rs.3.rs-5505878/v1), 2024-12-31
Supplement: Supplementary file 2 [file a84fb100210a3130ded2c3fb.docx]

**Supplementary Information for**

**Direct measure of soil carbon persistence over annual to centennial timescales**

Joshua D. Landisa*, Caitlin Hicks Priesb, Carl E. Renshawa, Sophie von Frommb, Diogo Spinolac, Raquel Portesc, William H. McDowelld,e, Christopher J. Nytchf, Jun Zhoug, Daniel Obristh, Marisa Palucisa, Karis McFarlanei

aDept. of Earth Sciences, Dartmouth College, Hanover, NH, 03755 USA

bDept. of Biological Sciences, Dartmouth College, Hanover, NH, 03755 USA

cFaculty of Environment, University of Northern British Columbia, Prince George, V2N 4Z9, CA

dDept. of Natural Resources and the Environment, University of New Hampshire, Durham, NH, 03824 USA

eInstitute of environment, Florida International University, Miami, FL, 33199 USA

fDept. of Environmental Sciences, University of Puerto Rico-Río Piedras, San Juan, PR 00925 USA

gState Key Laboratory of Soil and Sustainable Agriculture, Institute of Soil Science, Chinese Academy of Sciences, Nanjing, China 210008

hDivision of Agriculture and Natural Resources, University of California, Davis, CA 95616 USA

iCenter for Accelerator Mass Spectrometry, Lawrence Livermore National Laboratory, Livermore, CA 94550 USA

*joshua.d.landis@dartmouth.edu

This supplementary information consists of 12 pages and includes Discussions S1-S4 and Figures S1-S5.

**Discussion S1. Organo-metal associations in soil, and concordant radionuclide models of SOM age**

Carbon-metal associations begin in atmospheric deposition where fallout radionuclides (FRNs) and other particle-reactive metals bind to carbonaceous particulate matter (PM), to dissolved organic matter (DOM) in throughfall (rainfall passing through vegetation canopy), to foliar and forest floor soil organic matter (SOM), or, for geogenic 228Ra and 228Th, by direct fixation in foliar organic matter via root-shoot pathways 1,2 3. We refer to these associations as organometallic complexes since they are formed by sorption of metals to organic moities. Once transferred to soils with their associated natural organic matter (NOM), the conjoining of metal and carbon cycles persists during decomposition and the formation of authigenic oxyhydroxides of Fe, Al, and Mn in leaf litter and organic soil horizons 4–9. The conservation of heavy metals, fallout radionuclides, and carbon in organic and mineral soils is progressively driven by oxyhydroxide minerals, which are a primary factor in developing MAOM linked to soil carbon persistence 10–15. The thermodynamic affinity of Pb for SOM is comparable to that of the soil forming elements Fe and Al; these form the strongest metal-humate complexes 16,17. These organometal complexes thus formed evolve to organomineral complexes and MAOM by polymerization and aggregation during pedogenesis17,18. They promote the co-transport of metals and carbon both within soils and across landscapes 19–21. With their strong affinity for carbon, we propose that FRN age models are quintessential chronometers of soil carbon sequestration.

**Discussion S2. Comparing LRC, 14C age, and 14C turnover models**

*S.2.1 the LRC model.* The LRC model is an empirical, numerical age model based on the fallout radionuclides (FRNs) 7Be (half-life 54 days) and 210Pb (half-life 22.3 years). The FRNs are produced naturally in the atmosphere and deposited to vegetation and soil by wet and dry deposition in typical proportions of 80% and 20% of annual flux, respectively 22,23. FRNs are critical tracers of modern atmosphere-biosphere interaction because their production in the atmosphere is ubiquitous, their availability is thus universal, and due to their short half-lives their occurrence is readily related to their atmospheric source without overprinting due to mixing with legacy reservoirs.

The LRC model is similar to well-established peat and sediment dating using the well-known Constant Rate of Supply (CRS) model based on 210Pb but adds 7Be in an open-system framework to allow non-steady-state dating and to explicitly correct for the penetration of FRNs below the soil surface that occurs during rainfall and throughfall. Typically, ca. 40% of FRN deposition to the soil surface occurs with litterfall and the balance enters via wet deposition reaching soil depths of 10 to 15 cm with characteristic exponential decline 2,24,25. The model reference horizon is the canopy of vegetation, and the model traces net downward transport of 210Pb from the canopy through soil due to both advective and dispersive processes. Age dates should thus be seen as averages since mixing due to dispersion is not explicitly incorporated into the model. However, these ages accurately and precisely represent the migration time of e.g. an atmospheric pulse of metals such as Hg, Pb, and 241Am through the soil column in association with SOM 2,23,25. Impact of roots on LRC dating are discussed below in *Discussion S3*.

*S2.2. calibrated 14C age.* We explored two different approaches to estimating soil carbon age using 14C (Fig. S1). First, the dating approach compares soil 14C/12C isotopic composition ( in Δ14C notation) directly to the known atmospheric bomb curve using, e.g., the online CALIbomb tool 26. The Δ 14C age model assumes a system in which soil is treated as a composite of discrete layers that perfectly record atmospheric 14C from the time of carbon fixation. The approach does not accommodate soil dispersion that occurs due to bioturbation, cryoturbation, etc. 27. These processes dampen the bomb-peak concentration of 14C in soils by mixing layers of peak 14C deposition in the 1960s with those above and below containing lower 14C concentrations. The 14C dating model is thus unable to reconstruct the full timescale of 14C fixation and instead returns values that are discontinuous, either much younger or much older that the true age through decades of the 1960s to 1970s. We call this effect the bomb gap.

Finally, because atmospheric concentrations of 14C are non-unique through time, the 14C dating approach yields multiple candidate ages with no *a priori* expectation for choosing the likely correct one (Fig. S3). Here we define the age closest to LRC as the harmonized age.

*S2.3. 14C turnover models*. A second approach for extracting age information from 14C, the turnover model assumes a homogeneous pool of carbon per layer or horizon and models turnover time or TT of atmospheric 14C inputs to match measured soil Δ14C value, assuming steady-state between carbon losses and inputs, i.e. it is a black box mixing model 28,29. TT is the inverse of a first-order loss constant, *k*. The turnover box model requires a perfectly mixed static horizon in which ongoing inputs are homogenized within the box, with no age stratification. Output of 14C must exactly reflect composition of the whole pool. If, however, the pool is stratified, then outputs reflect only the oldest carbon, the pool remains younger than prediction, and the model will overestimate turnover time.

Like the calibrated 14C age model approach, the turnover model produces multiple candidate turnover times due to the symmetry of the atmospheric bomb curve (Fig. S4). These yield an hourglass shape when plotted against LRC soil age. By convention and absent other constraints, the older single-pool turnover time is typically selected (in keeping with presumptions of the model system as static and well-mixed). Here, LRC ages provide independent a priori evidence that the shorter TT is likely to be correct and we select the 14C candidate closest to LRC age as the harmonized estimate. The TT model numerically smooths data across the bomb gap, but its impact is still evidenced where, for example, the model is unable to converge to a solution for F14C values >1.13 for soils collected after 2022.

The 14C calibrated age and turnover approaches represent end-member scenarios of soil transport from pure advection to pure dispersion. LRC succeeds because it empirically measures net transport from both advection and dispersion. While resulting ages thus represent averages and the underlying distribution of ages remains unknown, nonetheless the mean age is both accurate and precise and, for example, accurately dates atmospheric inputs of metals and carbon 2,25.

**Discussion S3. impacts of root carbon and below-ground allocation on LRC dating of SOM**

The impact of below-ground carbon allocation (roots and exudates) on both age of SOM and the shape of the soil carbon depth profile remain challenging to quantify 30,31. Like 14C approaches, LRC does not distinguish root and shoot carbon based on age determination alone. This is important because of the different soil depths that root and shoot impact the carbon profile. When assessing the impact of below-ground carbon allocation on LRC dating, it is important to recognize that FRN deposition occurs to both above-ground and below-ground organic matter. Typically, ca. 40% of new FRN deposition is retained above ground by canopy of vegetation, and the remainder penetrates the soil surface where it directly labels or tags SOM *in situ*3,24. Below-ground FRN deposition declines exponential with depth with ca. 50% of deposition above 5 cm, and ca. 10% of deposition reaching 10 cm or more in forest soils 2,25.

The surface area of live root carbon is limited relative to bulk soil, so root biomass plays a limited role in binding FRNs. There is limited direct uptake of FRNs through plant metabolism, so we do not expect translocation of FRNs to growing roots. For example, in salt marsh with deep-rooted grasses, the contribution of roots to the 210Pb budget is about 10% for the entire profile (*unpublished data*). We instead expect that FRNs label or tag root and exudate carbon continuously, only as it turns over to the SOM pool. The age of SOM computed by LRC will then be a weighted average of above-ground SOM advecting through a given soil layer, and below-ground SOM produced *in situ*. We explicitly acknowledge that SOM is a mixture of younger and older components, and that LRC yields an average while the distribution of ages remains unknown.

At soil depths below FRN deposition the production of significant root or exudate SOM will not impact LRC datingbut will inject additional carbon into the soil profile. The turnover rates of this deep root carbon are generally unknown, and the impact on true age of SOM is therefore difficult to assess. It is significant that we do not see a crossover to younger ages in the LRC v. 14C age plot (Fig. S5), which suggests that the cumulative turnover of root carbon to SOM is slow relative to advection that governs the LRC model system. It may also be fortuitous that deep root carbon might have similar turnover times to surrounding SOM. From the perspective of carbon flux and *k* calculated with LRC ages, the injection of deep root carbon into the soil profile will offset SOM losses due to mineralization and may even yield increasing carbon flux with depth. In this manner LRC dating provides a means for identifying and possibly quantifying below-ground allocation if flux or *k* can be determined otherwise. It may be useful therefore to interpret LRC ages as migration times, which are complementary to carbon turnover and transit times derived from 14C approaches 30,32.

**Discussion S4. Estimating Luquillo NPP from above-ground productivity**

Above ground NPP for Luquillo sites is estimated to be 336 g m-2 y-1 for Elfin forest, 689 g m-2 y-1 for palo colorado, 1769 g m-2 y-1 for tabonuco, and as much as 1771 for sierra palm 33. We assume that below-ground allocation is typically about 30% of total, so if extrapolated to total NPP corresponding rates of carbon accumulation would be 480, 986, and 1362, and 2529 g m-2 y-1, respectively.

**Discussion S5. local calibration of atmospheric 14C using leaf timeseries**

We used a long-term time series of leaf collections to test how well local foliage reflects the published NHZ1 atmospheric curve used for ∆14C dating. We collected leaves of red oak (*Quercus rubra*) saplings approximately monthly from 2011 through 2021 for FRN analysis and here used archived samples to measure 14C 34,35. Age of leaves is known from the recorded date of leaf out. We found a mean difference =1.7 ±0.4 years (±SE, *n*=7) over the time span of 2013 to 2019 with NHZ1 slightly underestimating age of the leaves [two-tailed *t*, p=0.009].

**References**

1. Landis, J. D., Feng, X., Kaste, J. M. & Renshaw, C. E. Aerosol populations, processes and ages contributing to bulk atmospheric deposition: insights from a 9-year study of 7Be, 210Pb, sulfate and major/trace elements. *Journal of Geophysical Research: Atmospheres* (2021).

2. Landis, J. D. *et al.* Quantifying soil accumulation of atmospheric mercury using fallout radionuclide chronometry. *Nat Commun* **15**, 5430 (2024).

3. Landis, J. D. Age-Dating of Foliage and Soil Organic Matter: Aligning 228Th:228Ra and 7Be:210Pb Radionuclide Chronometers over Annual to Decadal Time Scales. *Environ Sci Technol* **57**, 15047–15054 (2023).

4. Witzgall, K. *et al.* Particulate organic matter as a functional soil component for persistent soil organic carbon. *Nat Commun* **12**, (2021).

5. Miller, E. K. & Friedland, A. J. Lead migration in forest soils: response to changing atmospheric inputs. *Environ Sci Technol* **28**, 662–9 (1994).

6. Wang, E. X. & Benoit, G. Fate and transport of contaminant lead in spodosols: A simple box model analysis. *Water Air Soil Pollut* **95**, 381–397 (1997).

7. Kaste, J. M., Friedland, A. J. & Miller, E. K. Potentially mobile lead fractions in montane organic-rich soil horizons. *Water Air Soil Pollut* **167**, 139–154 (2005).

8. Villalobos, M., Bargar, J. & Sposito, G. Mechanisms of Pb(II) sorption on a biogenic manganese oxide. *Environ Sci Technol* **39**, 569–576 (2005).

9. Schroth, A. W., Bostick, B. C., Kaste, J. M. & Friedland, A. J. Lead sequestration and species redistribution during soil organic matter decomposition. *Environ Sci Technol* **42**, 3627–3633 (2008).

10. Kaiser, K. & Guggenberger, G. The role of DOM sorption to mineral surfaces in the preservation of organic matter in soils. *Org Geochem* **31**, 711–725 (2000).

11. Schmidt, M. W. I. *et al.* Persistence of soil organic matter as an ecosystem property. *Nature* **478**, 49–56 (2011).

12. Sowers, T. D., Adhikari, D., Wang, J., Yang, Y. & Sparks, D. L. Spatial Associations and Chemical Composition of Organic Carbon Sequestered in Fe, Ca, and Organic Carbon Ternary Systems. *Environ Sci Technol* **52**, 6936–6944 (2018).

13. Kramer, M. G. & Chadwick, O. A. Climate-driven thresholds in reactive mineral retention of soil carbon at the global scale. *Nat Clim Chang* **8**, 1104–1108 (2018).

14. Kögel-Knabner, I. & Amelung, W. Soil organic matter in major pedogenic soil groups. *Geoderma* **384**, (2021).

15. Lalonde, K., Mucci, A., Ouellet, A. & Gélinas, Y. Preservation of organic matter in sediments promoted by iron. *Nature* **483**, 198–200 (2012).

16. Kerndorff, H. & Schnitzer, M. Sorption of metals on humic acid. *Geochimica Cosmochimica Acta* **44**, 1701–1708 (1980).

17. Pokrovsky, O. S., Dupré, B. & Schott, J. Fe-Al-organic colloids control of trace elements in peat soil solutions: Results of ultrafiltration and dialysis. *Aquatic Geochemistry* vol. 11 241–278 Preprint at https://doi.org/10.1007/s10498-004-4765-2 (2005).

18. Bazilevskaya, E., Archibald, D. D. & Martínez, C. E. Mineral colloids mediate organic carbon accumulation in a temperate forest Spodosol: depth-wise changes in pore water chemistry. *Biogeochemistry* **141**, 75–94 (2018).

19. Raudina, T. V. *et al.* Colloidal organic carbon and trace elements in peat porewaters across a permafrost gradient in Western Siberia. *Geoderma* **390**, (2021).

20. Škerlep, M. *et al.* Spruce forest afforestation leading to increased Fe mobilization from soils. *Biogeochemistry* **157**, 273–290 (2022).

21. Willenbring, J. K. & von Blanckenburg, F. Meteoric cosmogenic Beryllium-10 adsorbed to river sediment and soil: Applications for Earth-surface dynamics. *Earth Sci Rev* **98**, 105–122 (2010).

22. Landis, J. D. Whole-tree mass balance of fallout radionuclides and atmospheric metals, Chapter 6 in Terrestrial Exchange of Atmospheric Metals: Insights from Fallout Radionuclides. (Dartmouth College, Hanover, 2024).

23. Landis, J. D., Renshaw, C. E. & Kaste, J. M. Beryllium-7 and lead-210 chronometry of modern soil processes: The Linked Radionuclide aCcumulation model, LRC. *Geochim Cosmochim Acta* **180**, 109–125 (2016).

24. Landis, J. D. New Throughfall Mass Balance with Fallout Radionuclides, Chapter 5 in Terrestrial Exchange of Atmospheric Metals: Insights from Fallout Radionuclides. (Dartmouth College, Hanover, NH, 2024).

25. Landis, J. D., Taylor, V. F., Hintelmann, H. & Hrenchuk, L. E. Predicting behavior and fate of atmospheric mercury in soils: age-dating METAALICUS Hg isotope spikes with fallout radionuclide chronometry. *EnvironmentalScienceandTechnology* **inprint**, (2024).

26. Reimer, R. W. & Reimer, P. J. CALIBomb http://calib.org accessed 2024-2-7. *WWW Program* (2024).

27. Kaste, J. M., Heimsath, A. M. & Bostick, B. C. Short-term soil mixing quantified with fallout radionuclides. *Geology* **35**, 243 (2007).

28. Torn, M. S., Swanston, C. W., Castanha, C. & Trumbore, S. E. Storage and turnover of organic matter in soil. in *Biophysico-Chemical Processes Involving Natural Nonliving Organic Matter in Environmental Systems* (eds. Senesi, N., Xing, B. & Huang, P. M.) 54 (John Wiley & Sons, Inc., 2009).

29. Van Der Voort, T. S. *et al.* Dynamics of deep soil carbon - Insights from 14C time series across a climatic gradient. *Biogeosciences* **16**, 3233–3246 (2019).

30. Sierra, C. A. *et al.* Carbon sequestration in the subsoil and the time required to stabilize carbon for climate change mitigation. *Global Change Biology* vol. 30 Preprint at https://doi.org/10.1111/gcb.17153 (2024).

31. Amundson, R. *et al.* The radiocarbon age of soil carbon is a function of vertical transport rates. (2024) doi:10.21203/rs.3.rs-4992057/v1.

32. Sierra, C. A., Estupinan-Suarez, L. M. & Chanca, I. The fate and transit time of carbon in a tropical forest. *Journal of Ecology* **109**, 2845–2855 (2021).

33. Weaver, P. L. & Murphy, P. G. *Forest Structure and Productivity in Puerto Rico’s Luquillo Mountains*. vol. 22 https://about.jstor.org/terms (1990).

34. Landis, J. D. Accumulation of atmospheric metals in natural vegetation, Chapter 4 in Terrestrial Exchange of Atmospheric Metals: Insights from Fallout Radionuclides. (Dartmouth College, Hanover, NH, 2024).

35. Landis, J. D., Renshaw, C. E. & Kaste, J. M. Quantitative retention of atmospherically deposited elements by native vegetation is traced by the fallout radionuclides 7Be and 210Pb. *Environ Sci Technol* **48**, 12022–12030 (2014).

36. Appleby, P. G., Richardson, N. & Nolan, P. J. 241Am dating of lake sediments. *Hydrobiologia* **214**, 35–42 (1991).

37. Hua, Q. *et al.* ATMOSPHERIC RADIOCARBON for the PERIOD 1950-2019. *Radiocarbon* **00**, (2021).

38. Seiders, V. M. *Geologic Map of the El Yunque Quadrangle, Puerto Rico.  Miscellaneous Geological Investigations Map I-658*. (1991).

39. Burton, W. C., Walsh, G. J. & Armstrong, T. R. *Bedrock Geological Map of the Hubbard Brook Experimental Forest, Grafton County, New Hampshire. Open-File Report 00-45-A, v. 1.0*. http://pubs.usgs.gov/openfile/of00-45/ (1998).


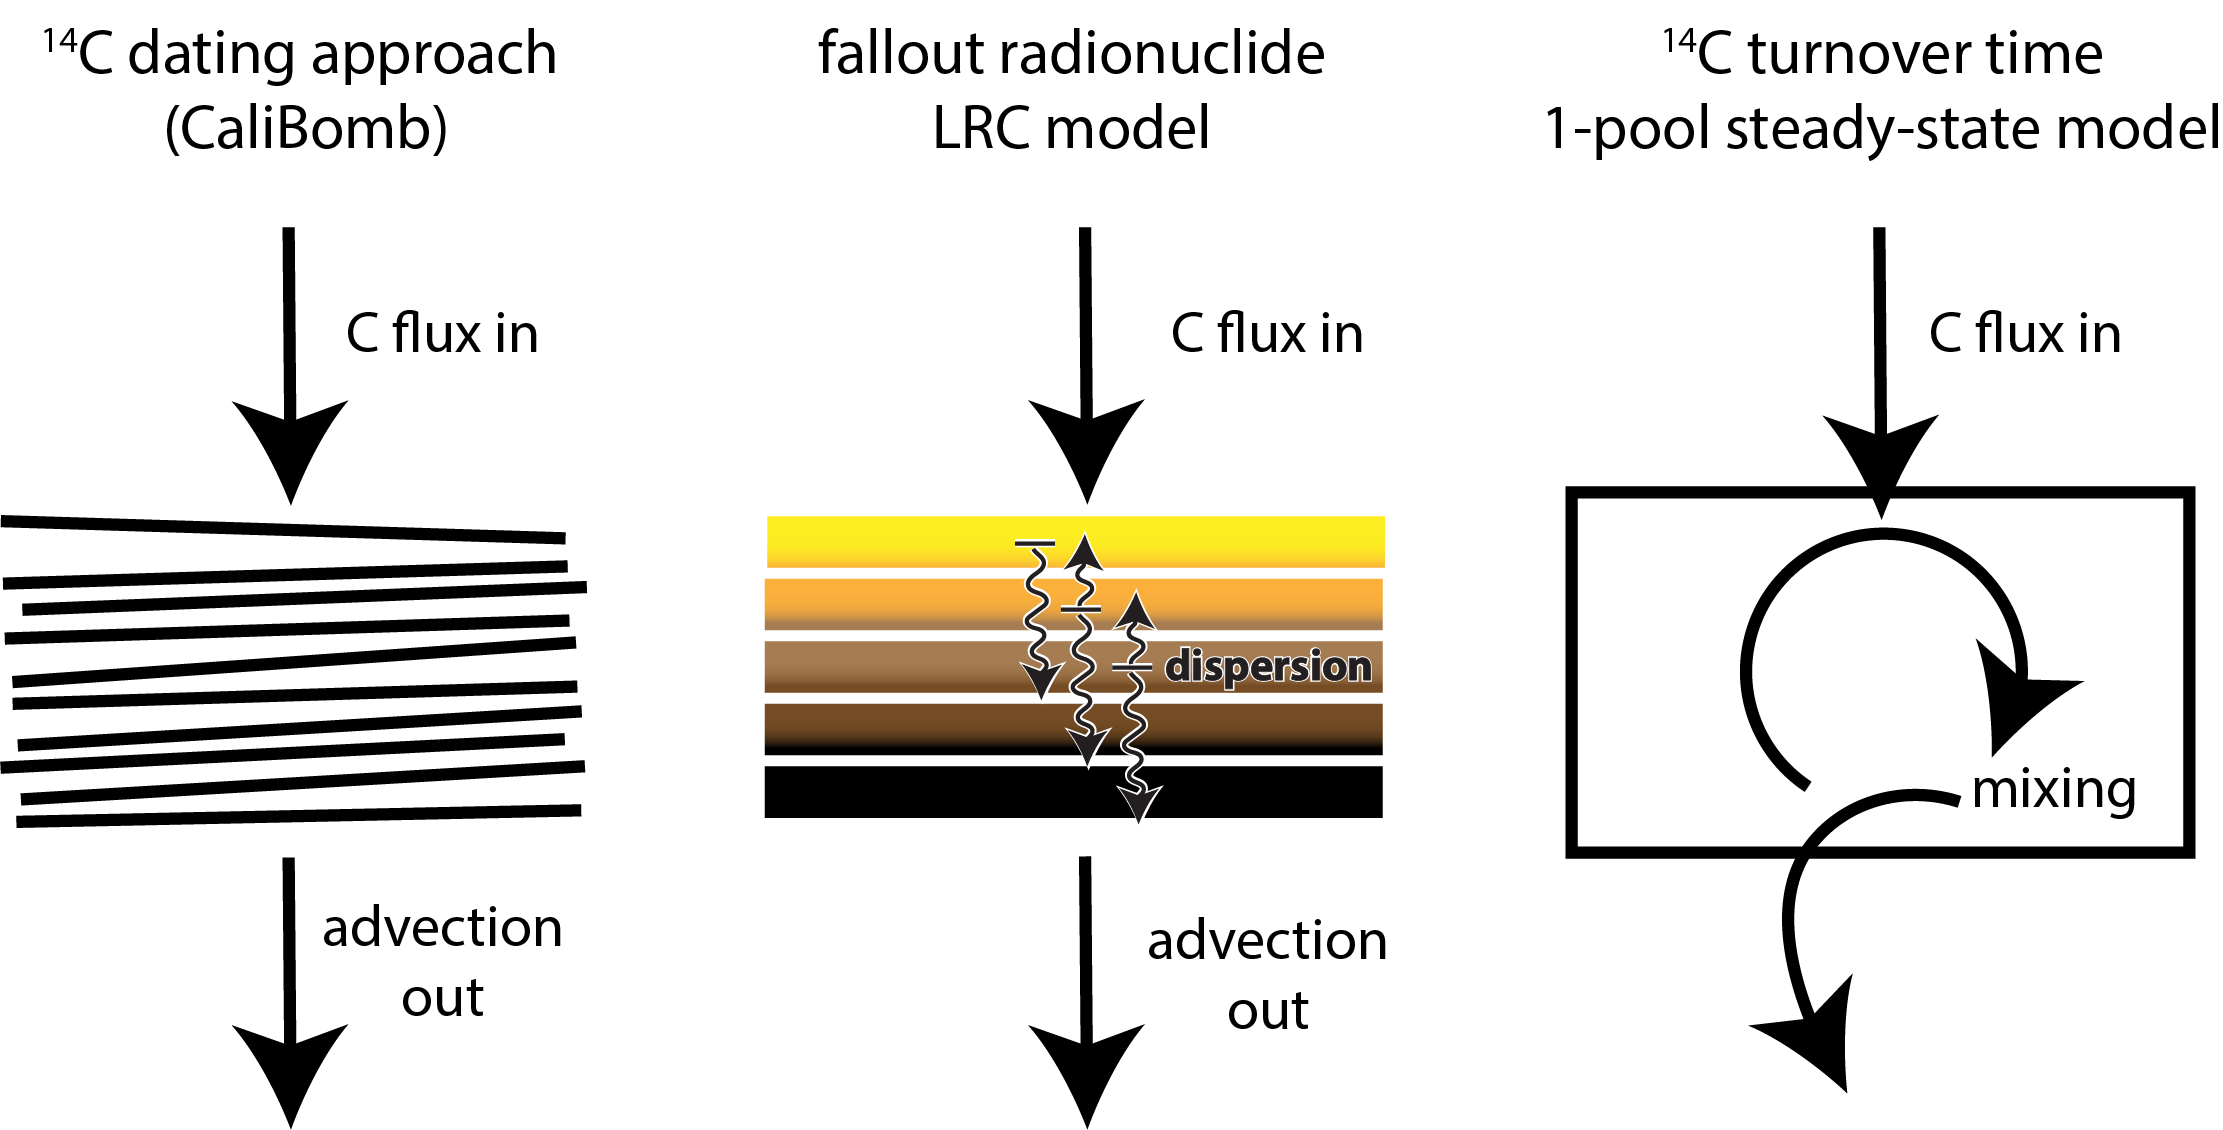


**Figure S1.** Conceptual models for soil carbon age-depth relationship. (a) calibrated 14C dating assumes no mixing and that carbon accumulates in discrete layers, e.g. CaliBromb 26, (b) fallout radionuclide Linked Radionuclide aCcumulation (LRC) model is an empirical numerical approach that measures net carbon transport and accommodates partial mixing, with age estimates representing an average of unknown distribution of ages, (c) 14C turnover model assumes steady-state single pool that is perfectly mixed with loss by first-order process proportional to pool size.


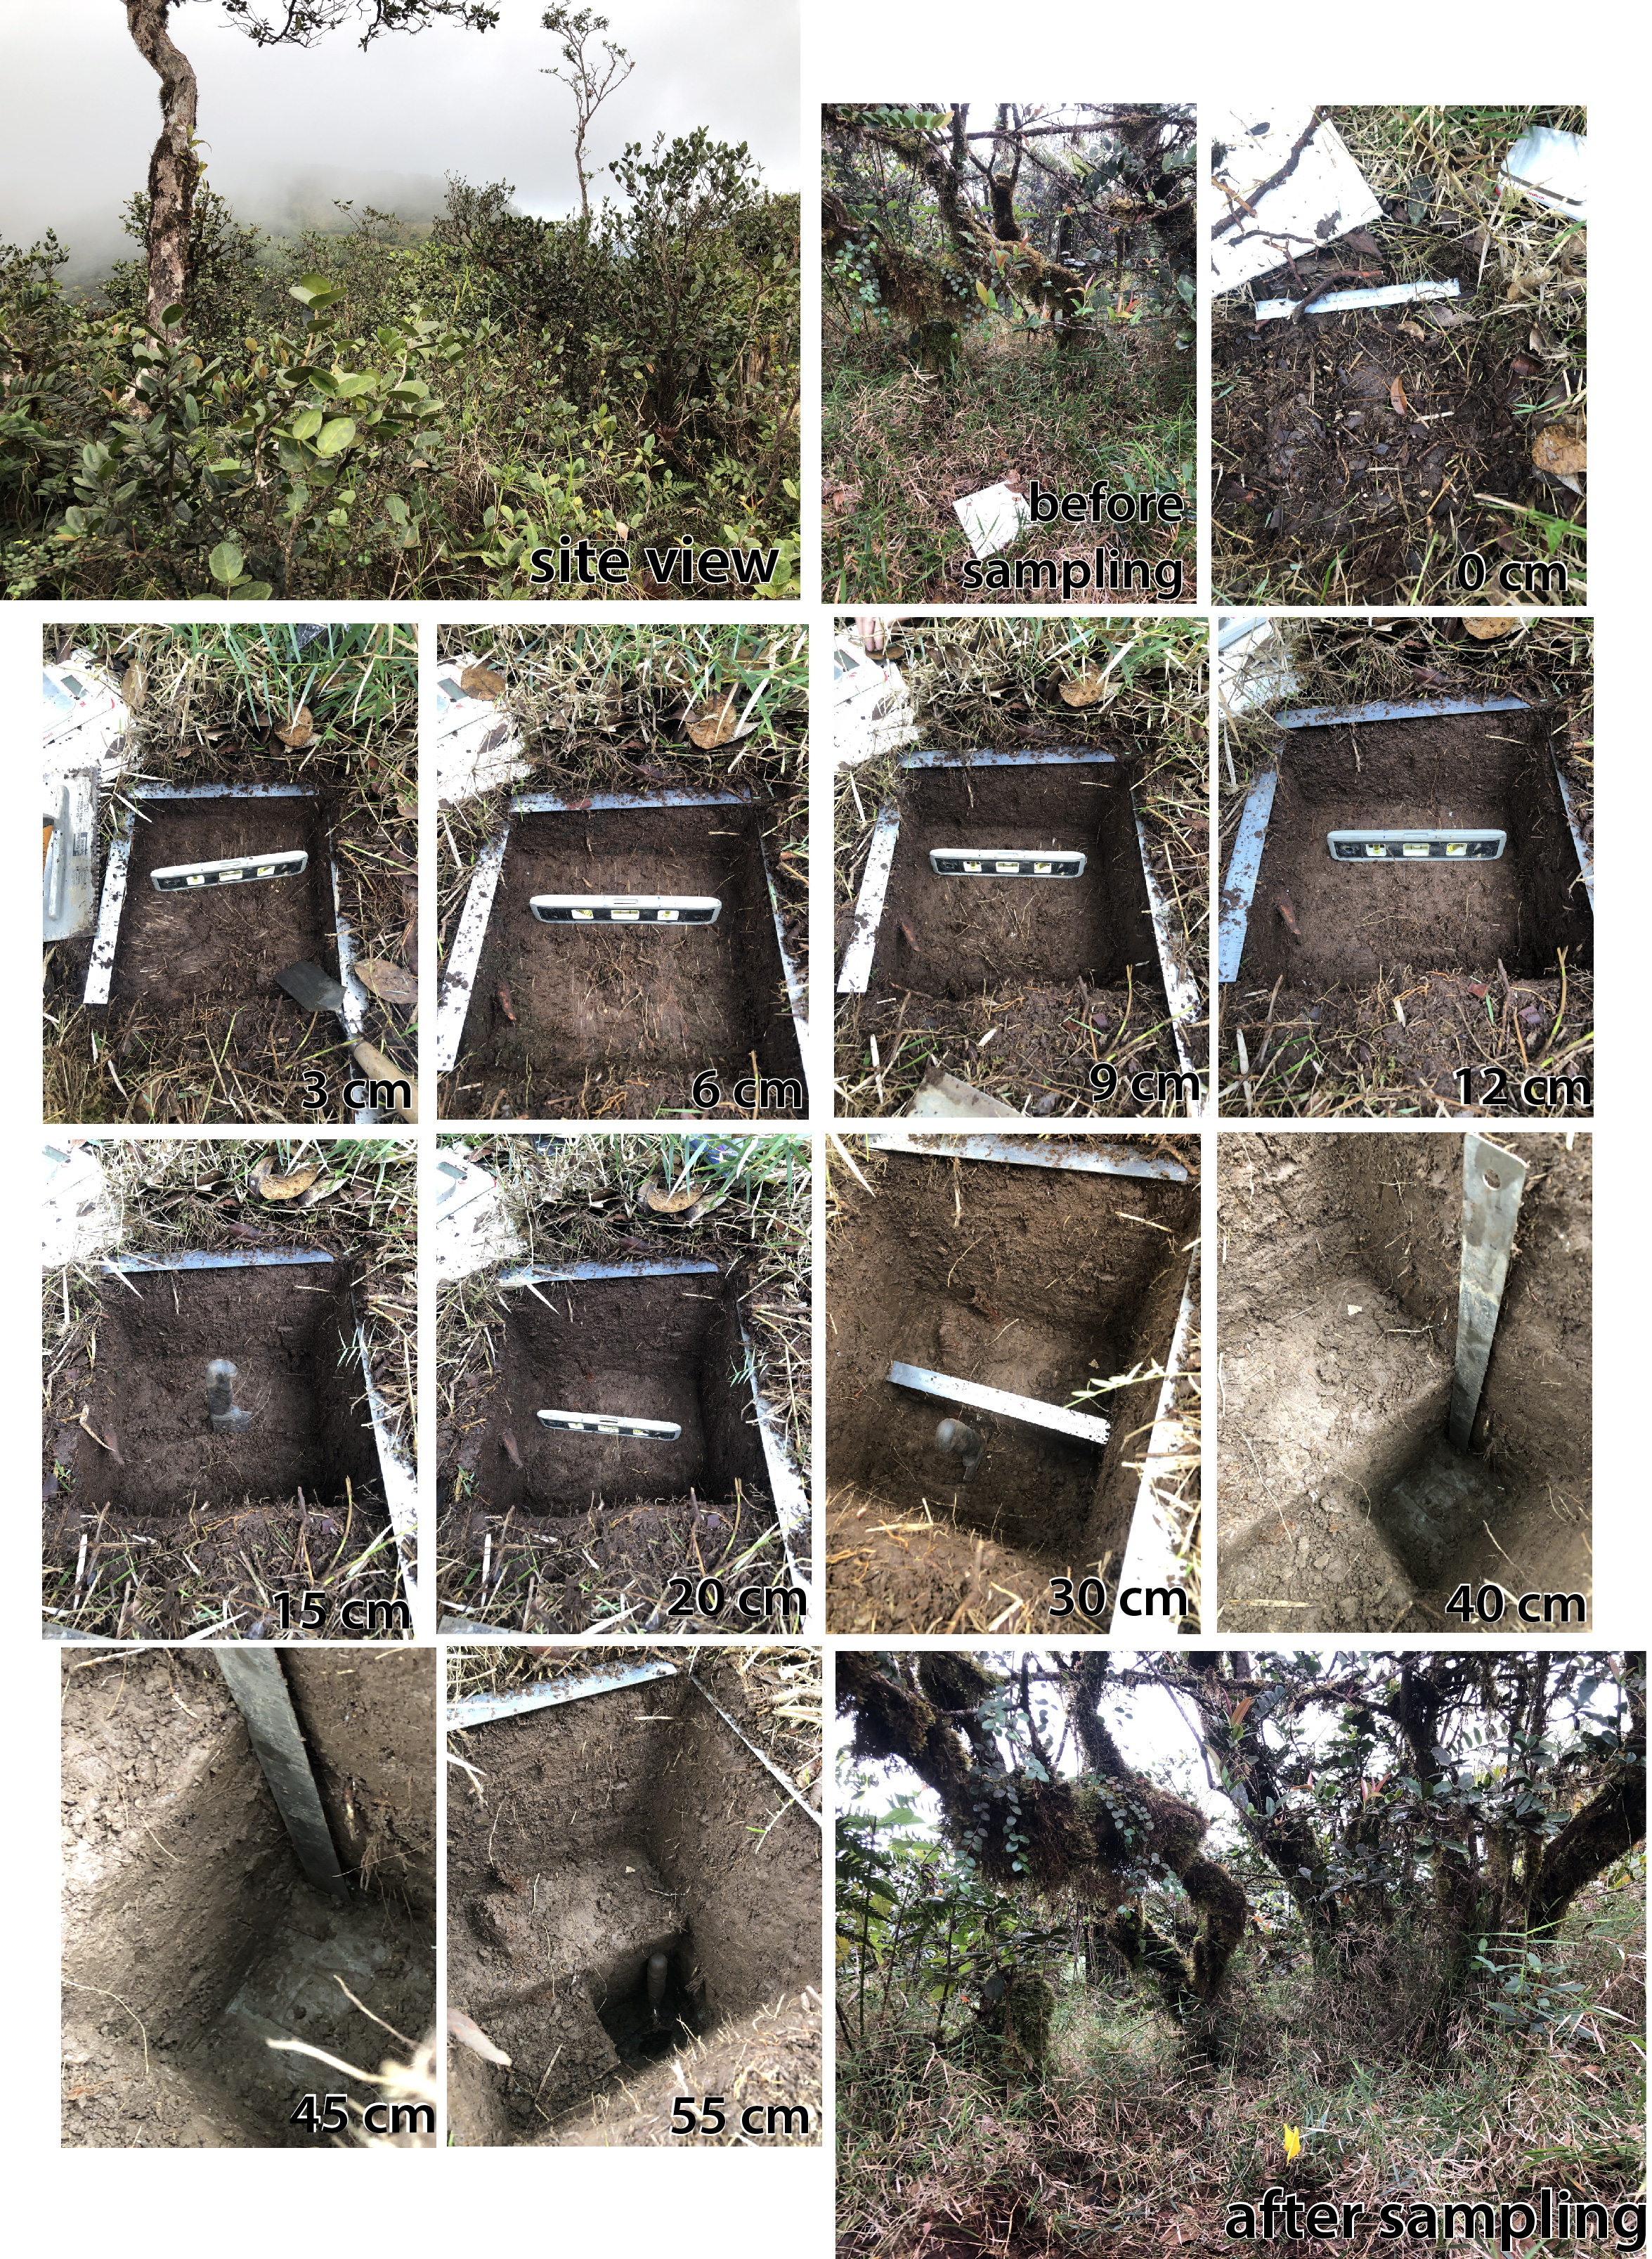


**Figure S2.** sampling montage of pit LeF03 (hydric Inceptisol underlain by marine-bedded volcaniclastics), 990 m.a.s.l. near Pico del Este, Luquillo LTER, Puerto Rico.


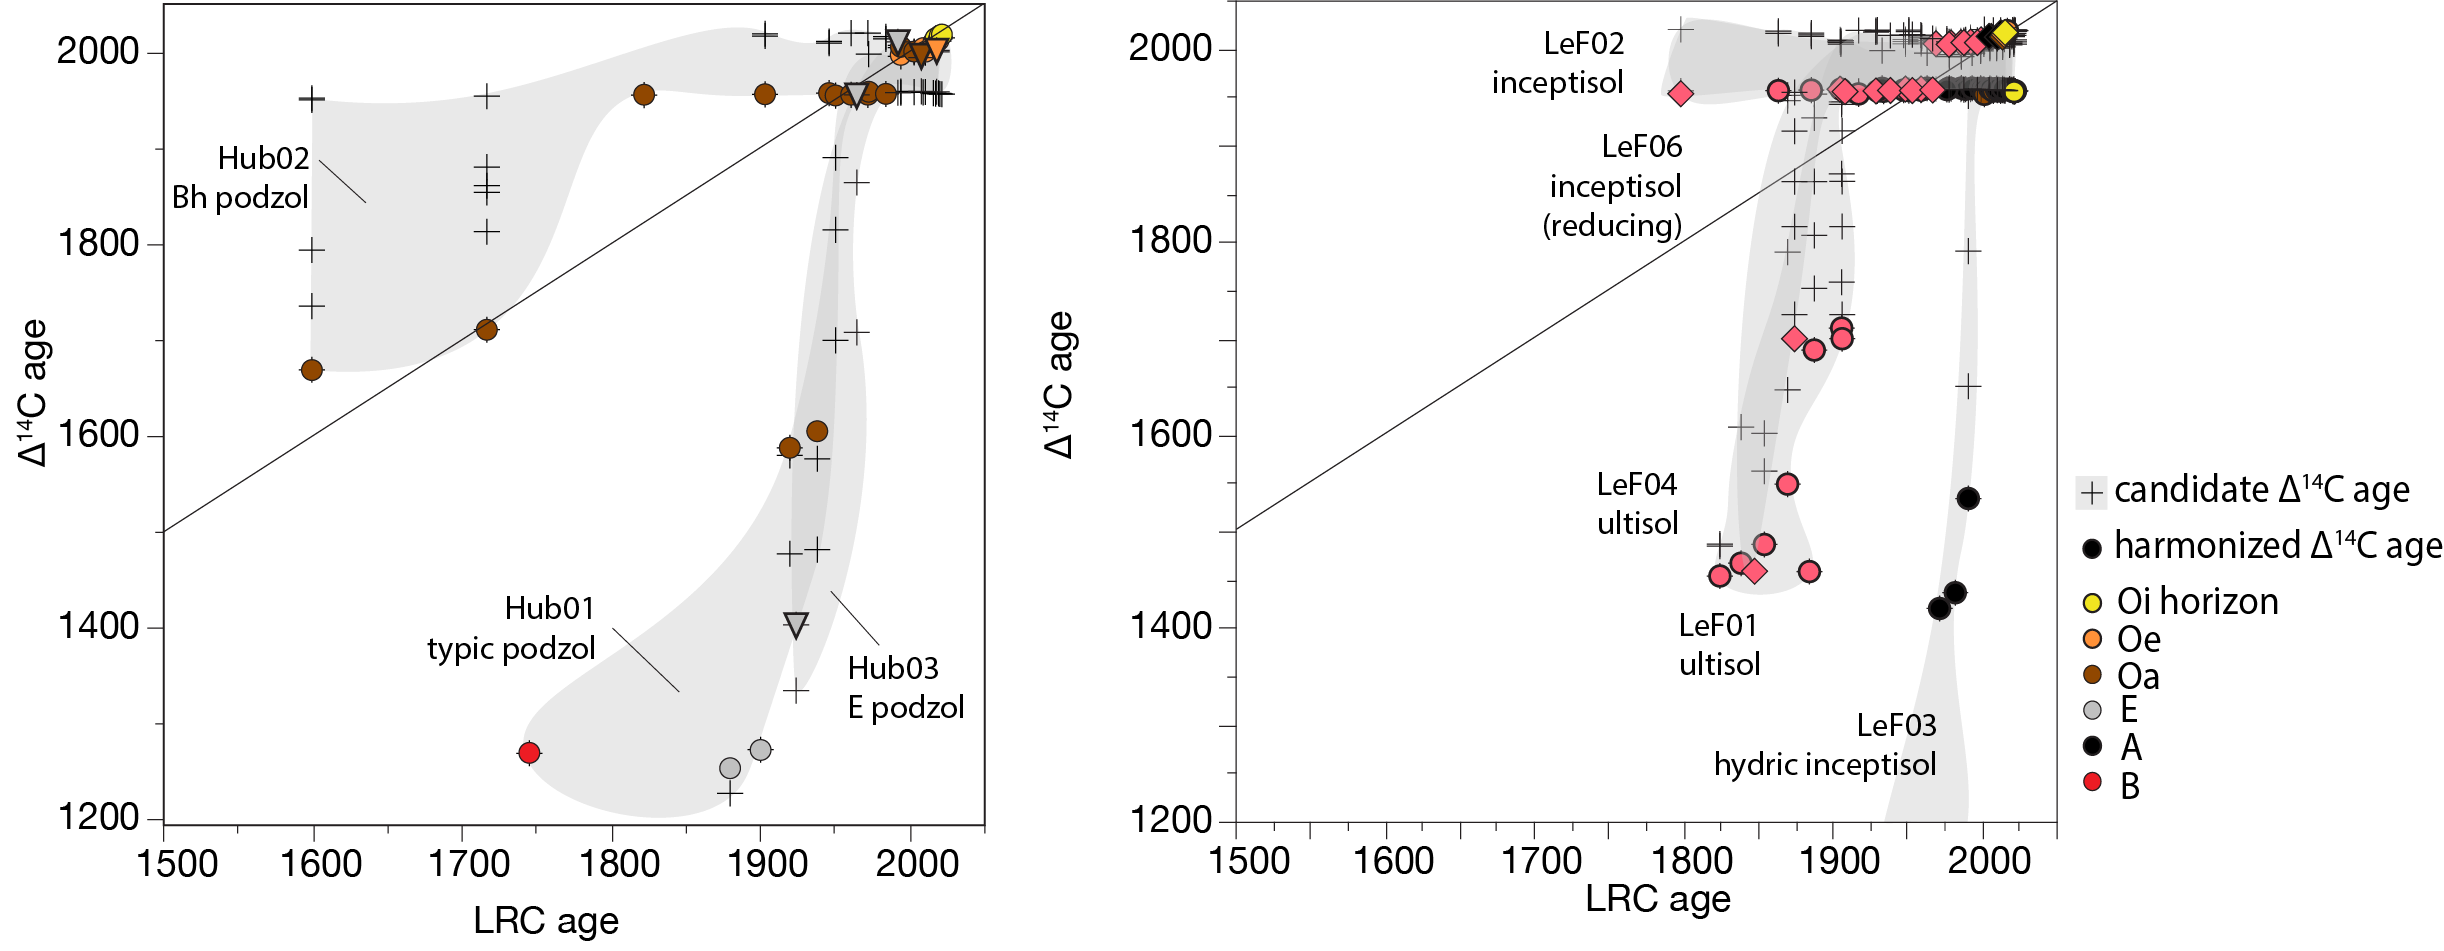


**Figure S3.** Candidate ages for Δ14C dating compared to LRC ages. The Δ14C approach produces multiple candidate ages due to symmetry and variation of the atmospheric 14C bomb peak. The age closest to RLC is chosen as the harmonized 14C age.


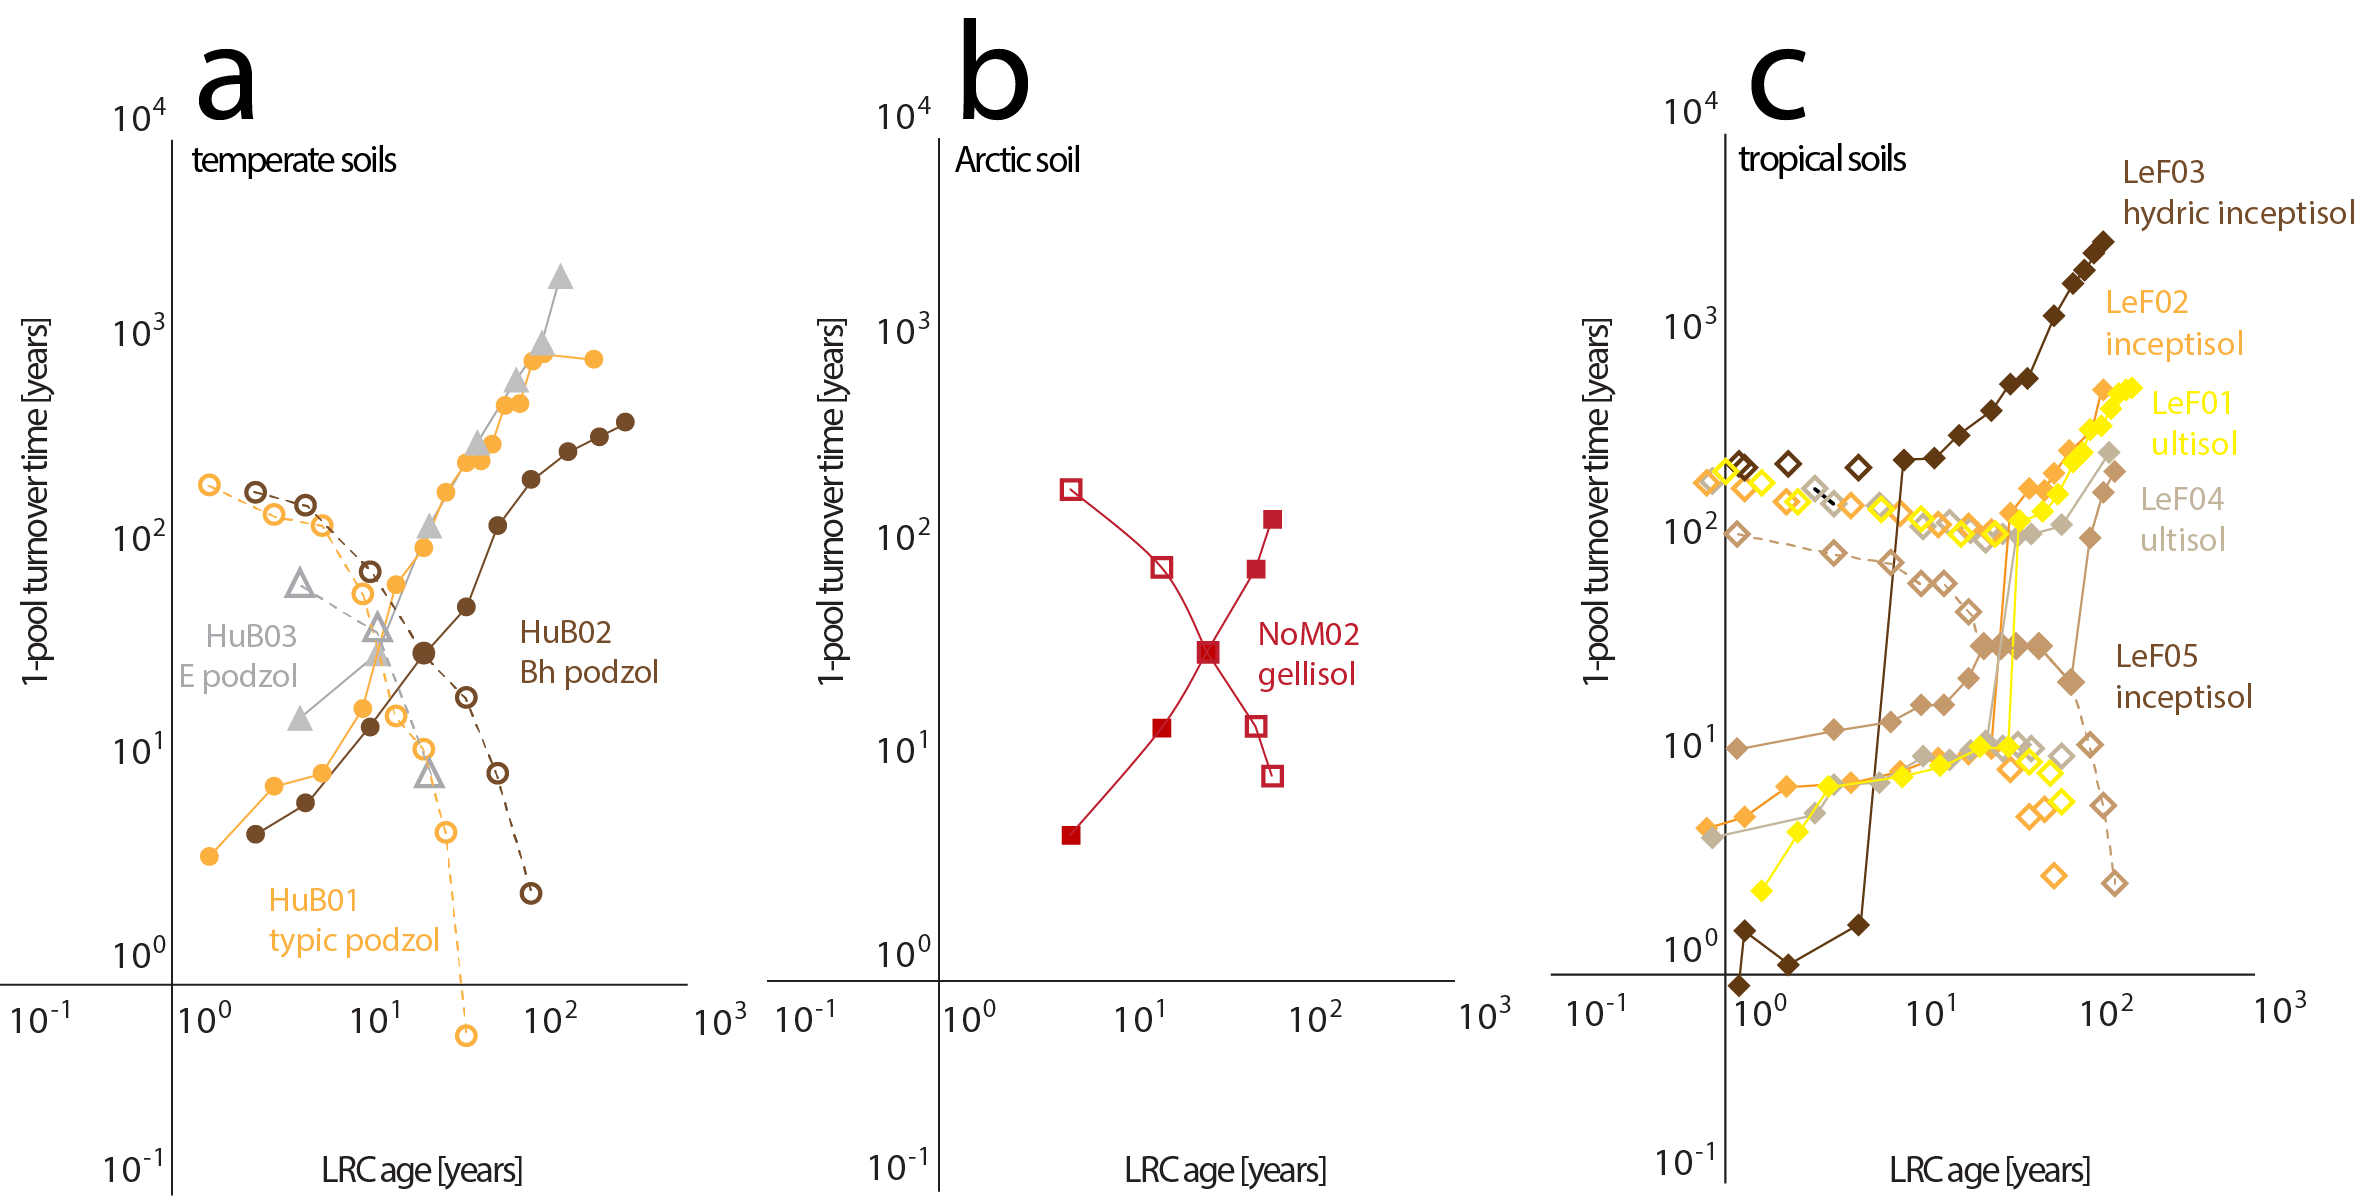


**Figure S4.** Candidate 1-pool 14C turnover times (TT) plotted against LRC age for (a) temperate (b) Arctic and (c) tropical soils. Individual soil profiles are distinguished by color, with closed symbols/solid line for harmonized TT (compatible with LRC age) and open symbols/dashed line for alternate TT. 14C turnover models yield two possible TTs due to symmetry of the global bomb curve. Note hourglass distribution of these ages. LRC provides *a priori* evidence to pick one. This requires "switchover" from younger to older turnover estimate which is most prominently shown for LeF03 in panel c. Note that age and turnover time are not directly comparable, and turnover is expected to be greater than age 28.

**
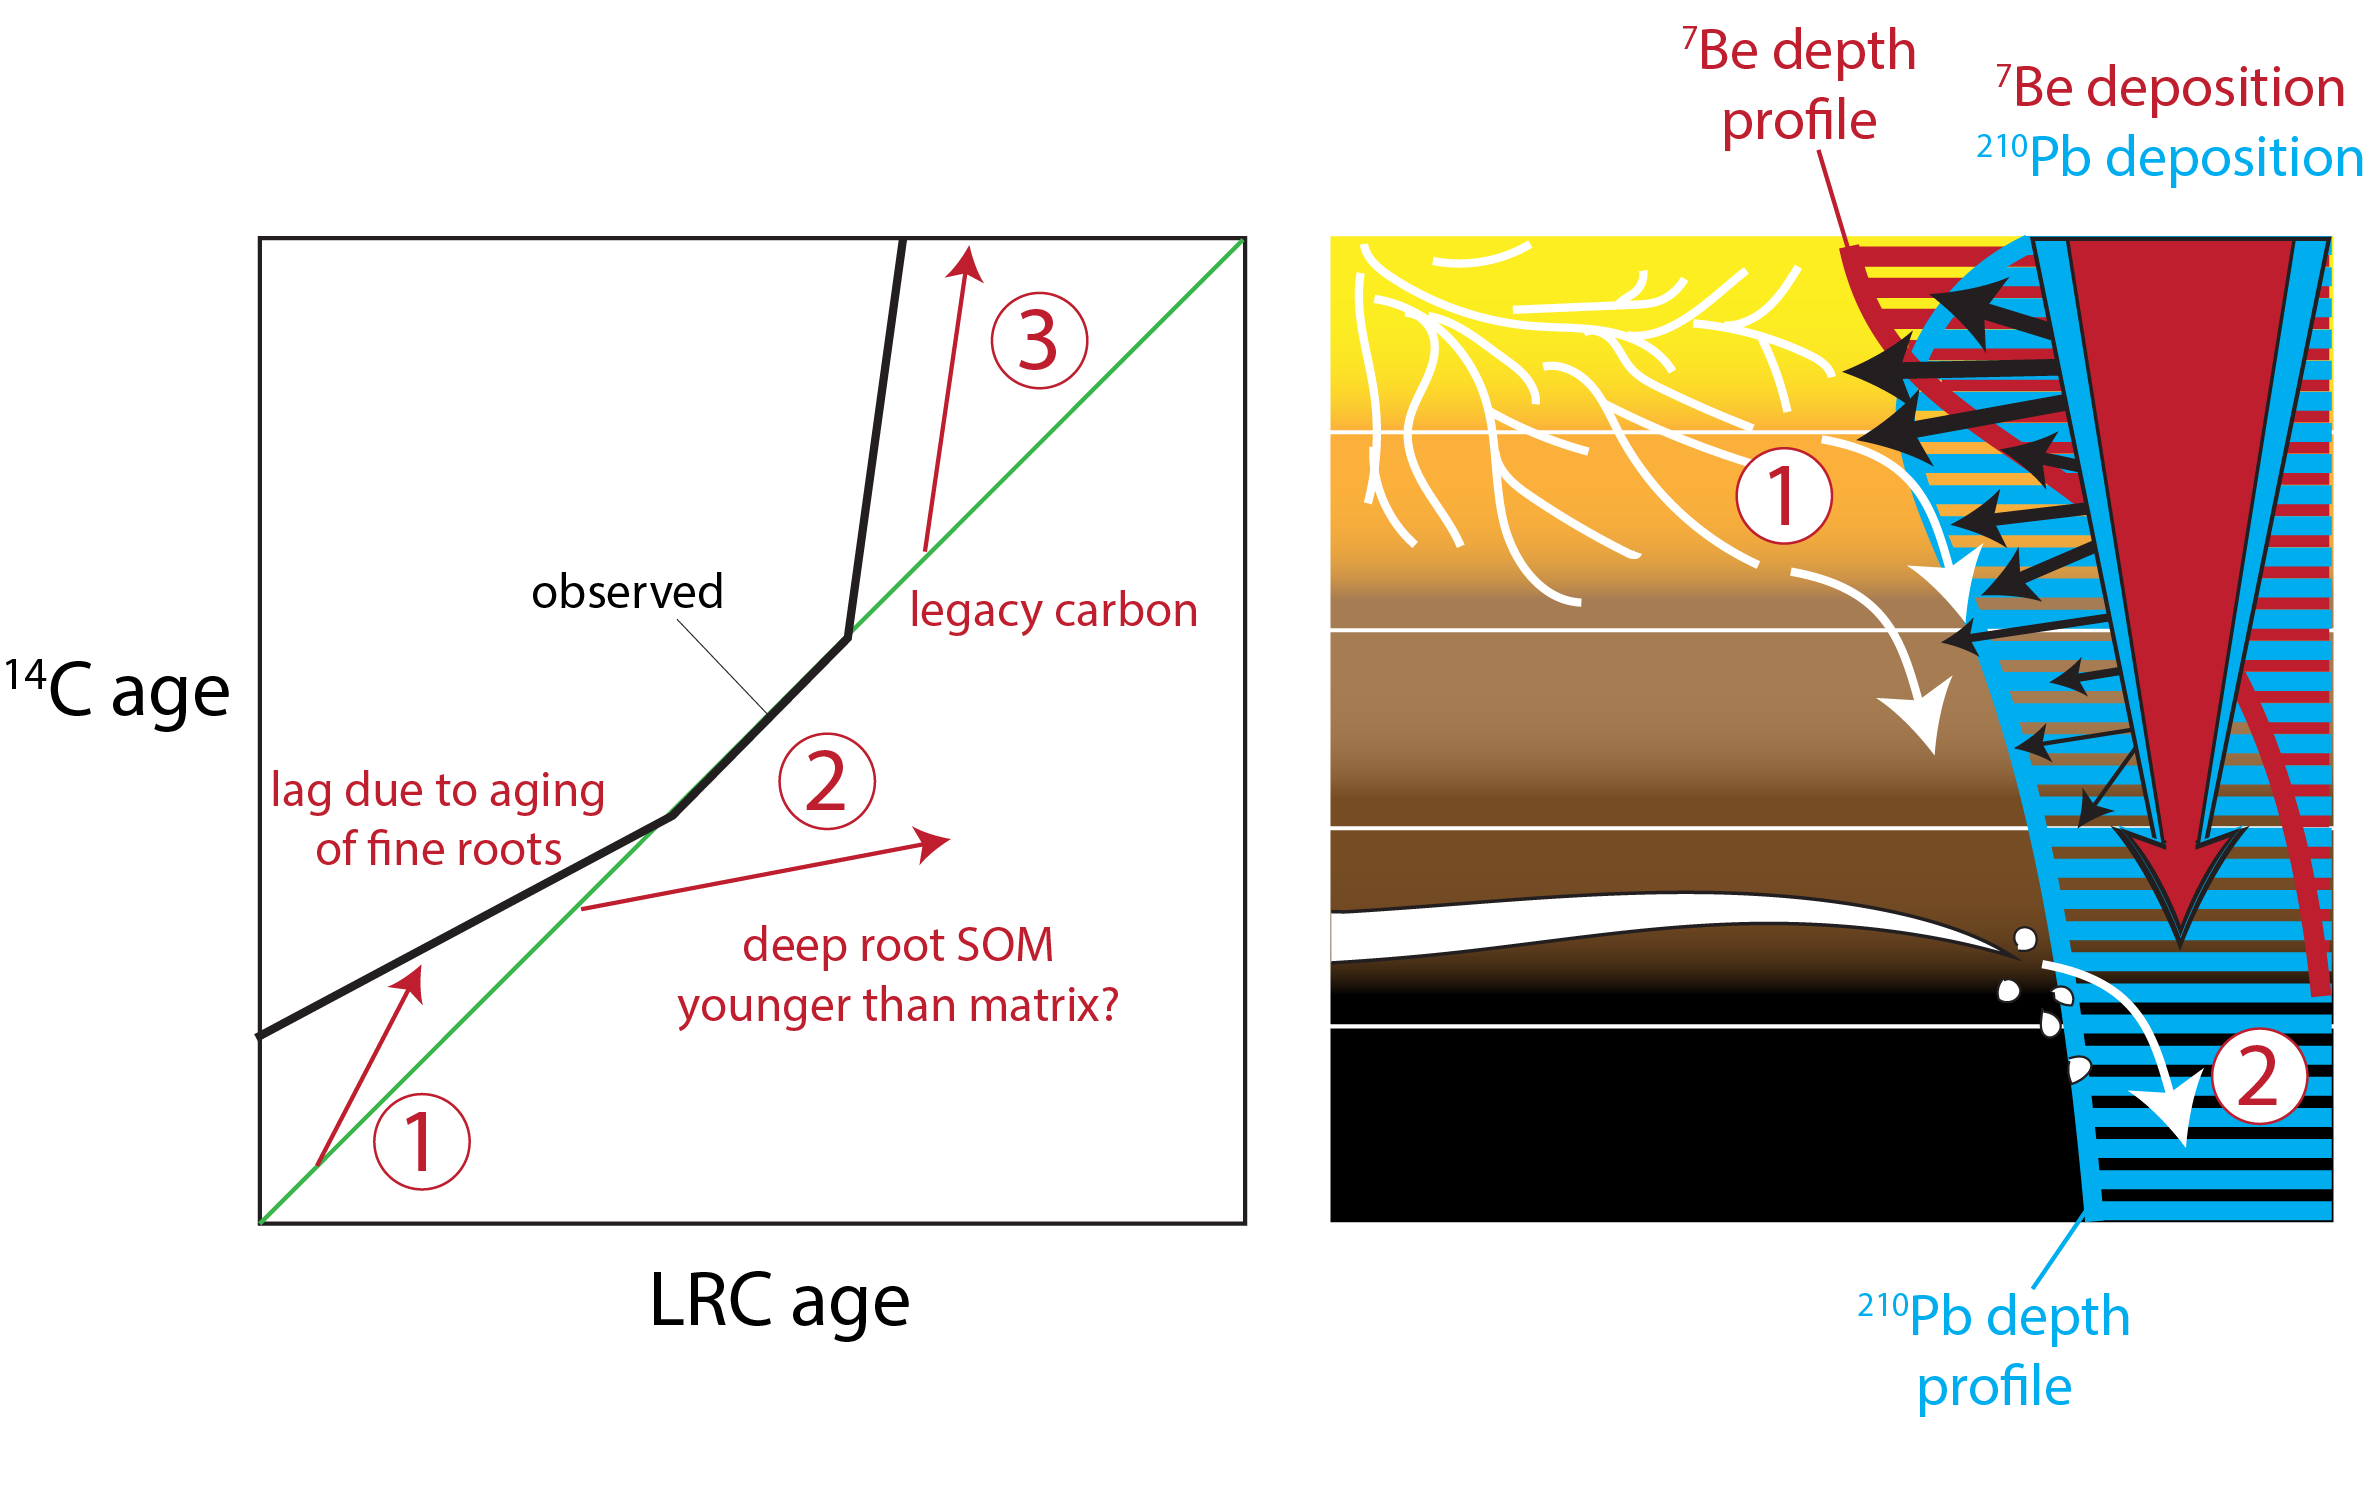
**

**Figure S5.** role of root carbon in LRC dating of SOM. (a) conceptual correlation plot of LRC v. 14C SOM ages shows the familiar lag time of carbon in upper most centimeters (1) corresponding to several decades, as well as contributions from legacy carbon in deeper mineral soils corresponding to ages of centuries to millenia (3). Observed data do not show significant contribution of deep root carbon that is differentially aged from surrounding matrix SOM (2) where 14C might be younger than LRC ages. This suggests that advection of SOM at all depth is fast relative to root inputs, (b) cartoon depicting FRN labelling of fine root carbon in upper organic soil horizons during atmospheric deposition, and injection of deep root carbon at depths below FRN deposition (>10 cm).
